# Supplementary material
Source: Springer Nature journal article supplement (https://www.springermedizin.de/resource/supplementary/12986_2005_58_MOESM1_ESM.pdf/25655362)

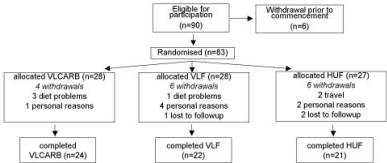

Supplement: MOESM1 [file 25655362]
